# Supplementary material for: Crambescidin-816 Acts as a Fungicidal with More Potency than Crambescidin-800 and -830, Inducing Cell Cycle Arrest, Increased Cell Size and Apoptosis in Saccharomyces cerevisiae
Source: Mar Drugs. 2013 Nov 8;11(11):4419–34. doi: 10.3390/md11114419 (PMC3853736; doi:10.3390/md11114419)

## Supplementary Information

**Figure S1.** (a) Percentage of live or necrotic cells after *S. cerevisiae* treatment with C816 or vehicle for 10 h. No increase of permeabilized cells was detected after C816 treatment. Ethanol permeabilized *S. cerevisiae* were used as positive control for PI nuclei staining. (b) Fluorescence microscopy analysis of C816 treated *S. cerevisiae* as in a. Merged PI staining and bright field for each treatment are shown.

**Figure S2.** (a) Histograms obtained after *S. cerevisiae* treatment with C816 or vehicle for 24 h, showing an increase in the subC1 population in 700 and 1000 nM treated cells. (b) Selected images of subC1 cells obtained by imaging flow cytometry. Ch1: Side scatter, Ch2: Bright field, Ch5: PI stained DNA, Ch2-Ch5: Composite obtained merging Ch2 and 5.

**Figure S3.** Representative images for healthy (control cells), Annexin V and Annexin V-PI stained cells (C816 treated cells).

**Figure S1.** (a) Percentage of live or necrotic cells after *S. cerevisiae* treatment with C816 or vehicle for 10 h. No increase of permeabilized cells was detected after C816 treatment. Ethanol permeabilized *S. cerevisiae* were used as positive control for PI nuclei staining. (b) Fluorescence microscopy analysis of C816 treated *S. cerevisiae* as in a. Merged PI staining and bright field for each treatment are shown.

**a**

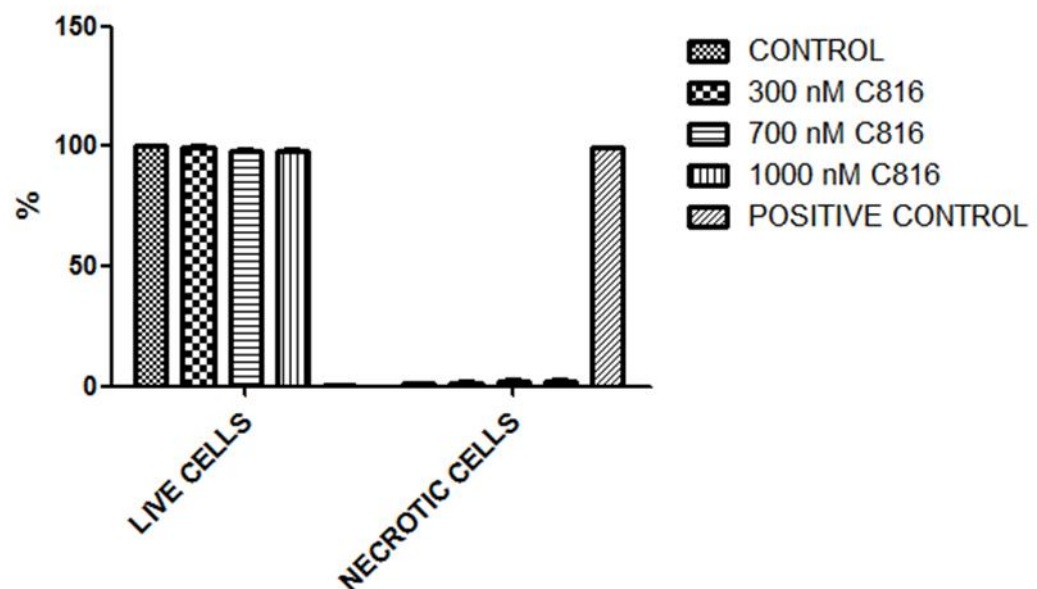

**b**

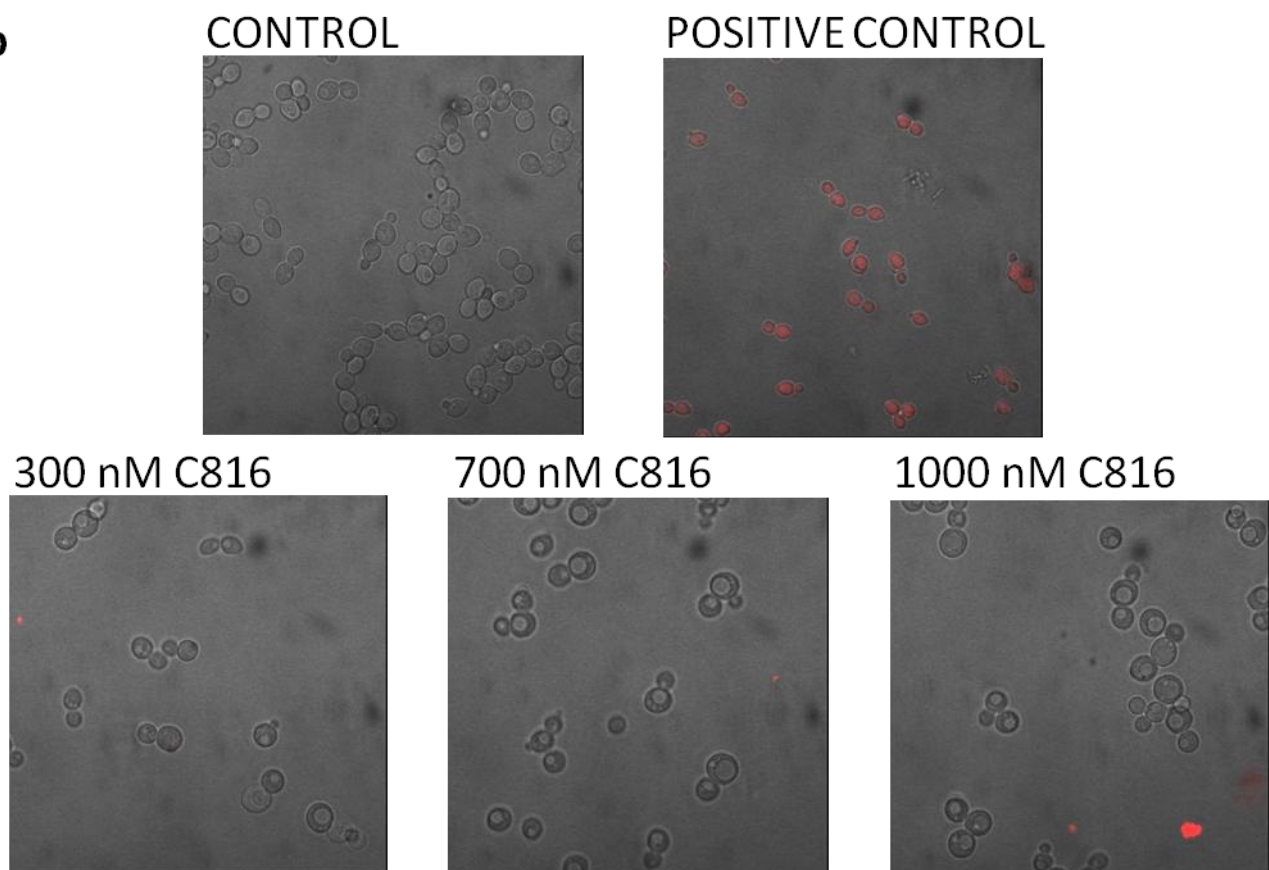

**Figure S2.** (a) Histograms obtained after *S. cerevisiae* treatment with C816 or vehicle for 24 h, showing an increase in the subC1 population in 700 and 1000 nM treated cells. (b) Selected images of subC1 cells obtained by imaging flow cytometry. Ch1: Side scatter, Ch2: Bright field, Ch5: PI stained DNA, Ch2-Ch5: Composite obtained merging Ch2 and 5.

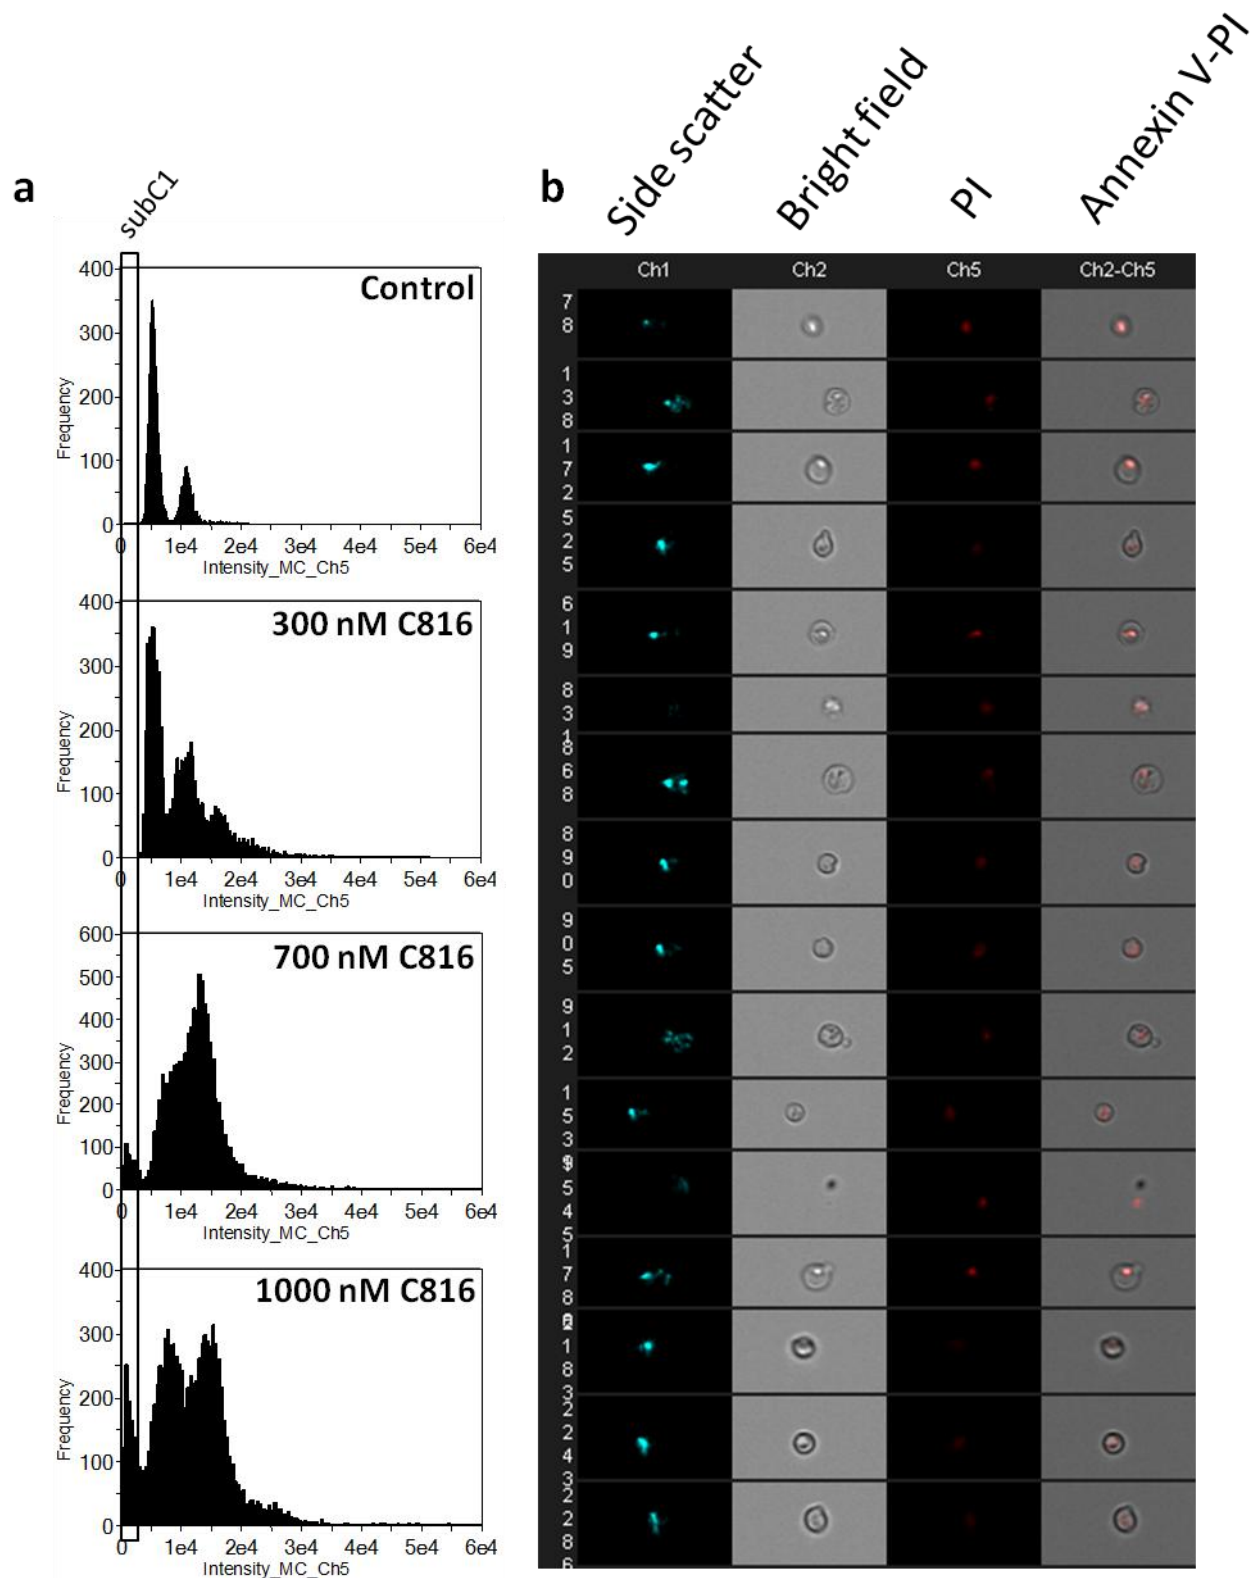

**Figure S3.** Representative images for healthy (control cells), Annexin V and Annexin V-PI stained cells (C816 treated cells).

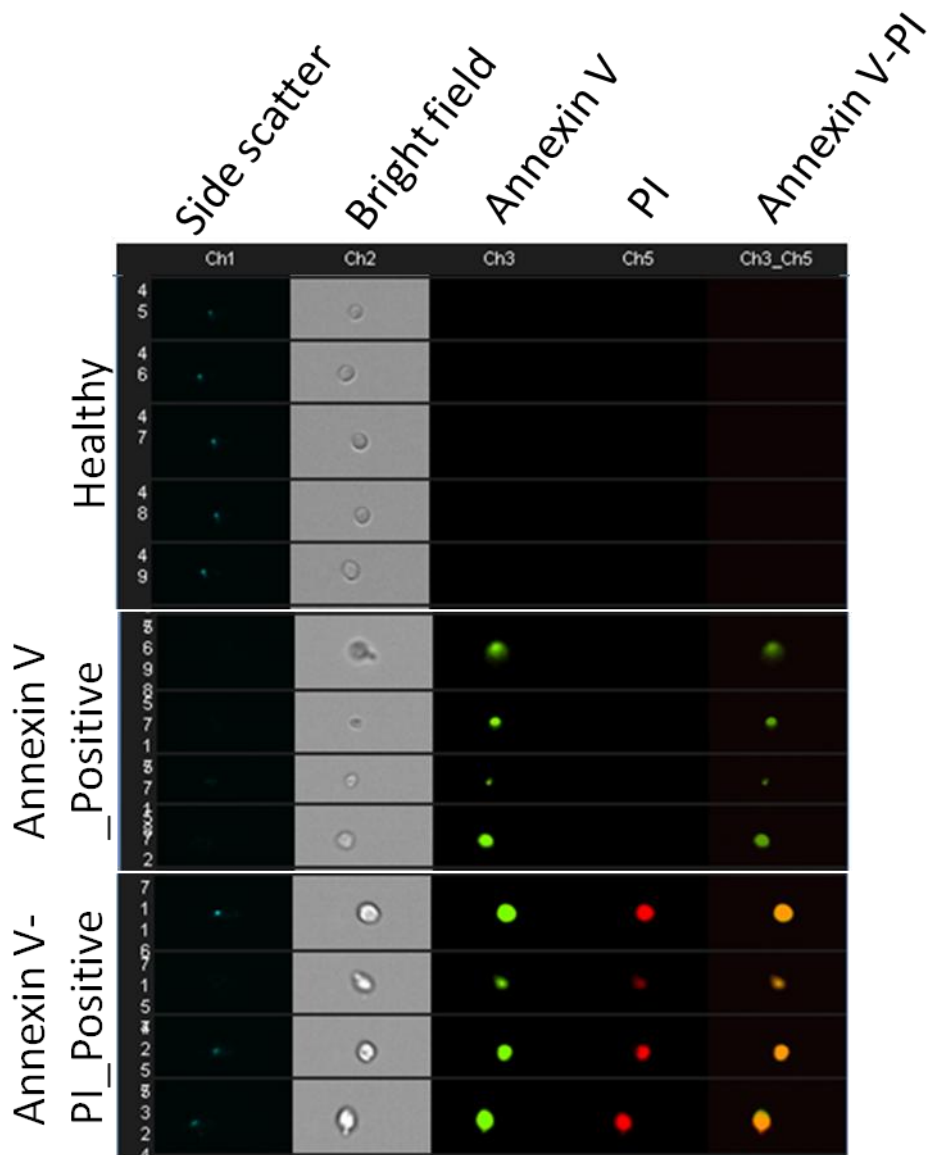

Supplement: Supplementary File 1 — Supplementary Information (PDF, 287 KB) [file marinedrugs-11-04419-s001.pdf]
